# Supplementary material for: Centromere innovations within a mouse species
Source: PubMed Central journal article supplement — Sci Adv. 2023 Nov 15;9(46):eadi5764. doi: 10.1126/sciadv.adi5764 (PMC10651114; doi:10.1126/sciadv.adi5764), 2023-11-15
Supplement: sciadv.adi5764_sm.pdf [file sciadv.adi5764_sm.pdf]

Supplementary Materials for  
**Centromere innovations within a mouse species**

Craig W. Gambogi *et al.*

Corresponding author: Ben E. Black, [blackbe@penmedicine.upenn.edu](mailto:blackbe@penmedicine.upenn.edu)

*Sci. Adv.* **9**, eadi5764 (2023)  
DOI: 10.1126/sciadv.adi5764

**This PDF file includes:**

Figs. S1 to S4  
Table S1

# Figure S1

|        |            |           |     |       |         |         |        |    |           |            |          |         |       |         |      |       |     |    |   |     |
|--------|------------|-----------|-----|-------|---------|---------|--------|----|-----------|------------|----------|---------|-------|---------|------|-------|-----|----|---|-----|
| k-mer  | CATGATTAC  | TCTGTTTTT | T   | CT    | CTGAGTT | TTGTGT  | -      | AA | AACAAGTGA | TTT        | CTTAAA   | GATCT   | TATTA | 68      |      |       |     |    |   |     |
| TAREAN | CATGATTAC  | TCTGTTTTT | C   | --    | A       | TGAGTT  | TTGTGT | GT | AA        | AACAAGTGA  | TTT      | CTTAAA  | GATCT | -       | ATTA | 65    |     |    |   |     |
| k-mer  | GACACATTG  | AGAGATTTT | TT  | GT    | AGAACA  | AGCATAT | A      | A  | T         | CATGAGTTTA | GTTCCT   | GAAA    | TACTG | GATTA   | 137  |       |     |    |   |     |
| TAREAN | GACACATTG  | AGAGATTTT | --  | GT    | AGAACA  | AGCATAT | G      | A  | T         | ATGAGTTTA  | GTTCCT   | A       | AAA   | TACTG   | -    | GATTA | 132 |    |   |     |
| k-mer  | ATTCTATGAA | AAC       | TN  | TCCAC | AATTC   | TT      | -      | -  | T         | CAGAGCAA   | A        | AAGTACA | AG    | -       | ATCT | -     | -   | -  | - | 188 |
| TAREAN | -          | TCTATGAA  | AAC | A     | T       | TCCAC   | AATTC  | TT | GT        | T          | CAGAGCAA | -       | T     | AAGTACA | AG   | ATCT  | GC  | AT | T | 189 |

**Figure S1:  $\pi$ -sat sequence is almost identical to the top hit identified by the  $k$ -mer strategy.**  
Alignment of the satellites derived from the  $k$ -mer and TAREAN approach.

**Figure S2**

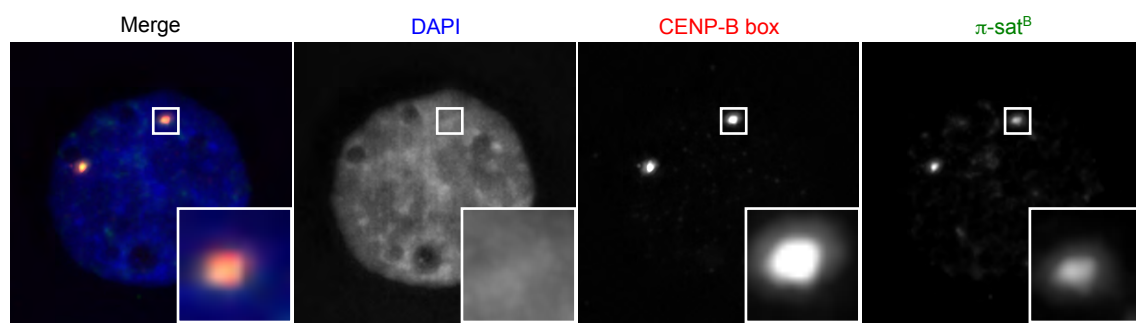

**Figure S2: Functional CENP-B box is found at an pair of homologues containing  $\pi$ -sat<sup>B</sup>.**

Representative image of *M. pahari* fibroblast cells labeled with CENP-B box and  $\pi$ -sat<sup>B</sup> FISH probes. Insets: 4.6x magnification. Bar, 10  $\mu$ m.

# Figure S3

CENP-B box

|                           |                         |    |
|---------------------------|-------------------------|----|
| $\pi$ -sat <sup>tel</sup> | <b>TTTCGTGTAAGGGGGT</b> | 17 |
| $\pi$ -sat <sup>B</sup>   | <b>TTTCGTGTAAGCGGGT</b> | 17 |
|                           | TTTCGTGTAAGCGGGT        |    |

**Figure S3: Functional CENP-B boxes found at chromosome 11 differ from functional CENP-B boxes found on  $\pi$ -sat<sup>tel</sup> on other centromeres.**

Alignment of functional CENP-B box from  $\pi$ -sat<sup>B</sup> and  $\pi$ -sat<sup>tel</sup>

**Figure S4**

**A**

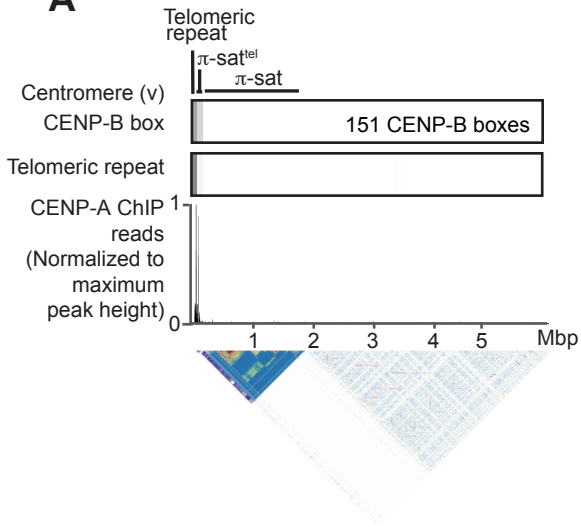

**B**

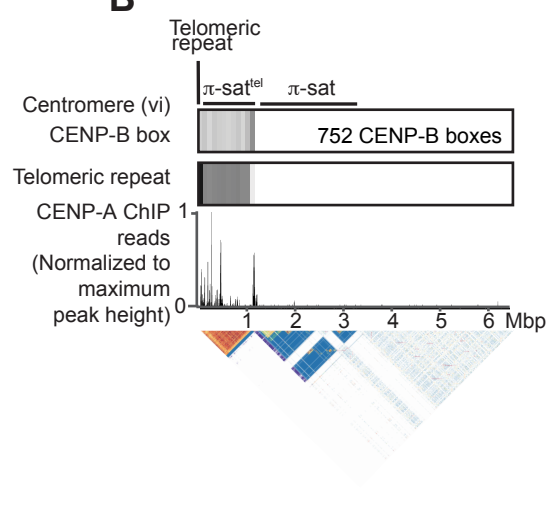

**C**

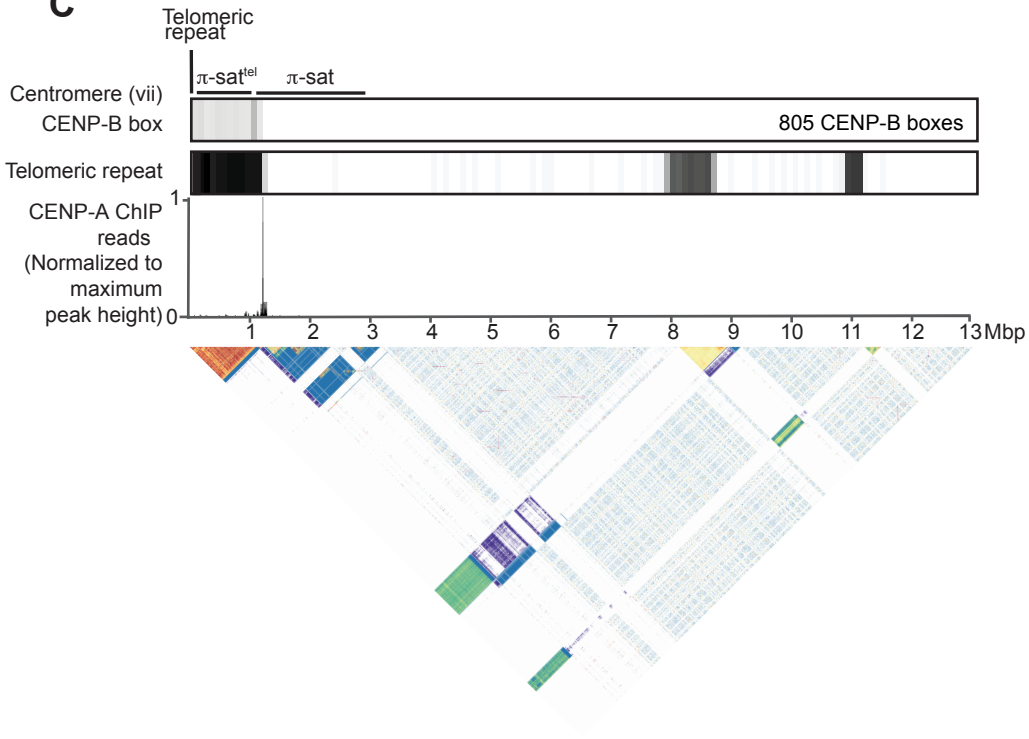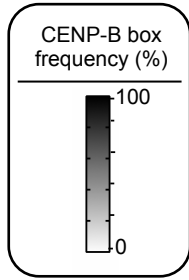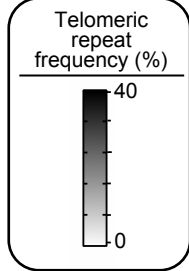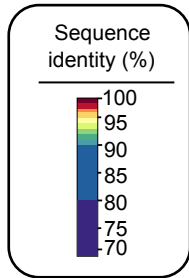



**Figure S4: Three additional *M. pahari* centromeres, all containing similar overall organization.**

A-C) The fraction of  $\pi$ -sat repeats containing a functional CENP-B box (NTTCGNNNNANNCGGGN) and the frequency of telomeric repeats (TTAGGG) are shown. CENP-A ChIP-seq reads were aligned to the assembly revealing that CENP-A is primarily present on  $\pi$ -sat<sup>tel</sup>. A pairwise sequence identity heat map indicates the degree of homogeneity in centromeric DNA.

**Table S1**

| Species                            | Repeat associated with CENP-A nucleosomes | Repeat unit size (bp) | Sequence identity to minor sat (%) |
|------------------------------------|-------------------------------------------|-----------------------|------------------------------------|
| <i>M. musculus</i>                 | Minor sat                                 | 120                   | -                                  |
| <i>M. spretus</i>                  | Minor sat                                 | 120                   | -                                  |
| <i>M. caroli</i>                   | <i>M. caroli</i> satellite repeat         | 60 or 79              | 57                                 |
| <i>M. pahari</i> chromosome 11     | $\pi$ -sat <sup>B</sup>                   | 189                   | 52                                 |
| Other <i>M. pahari</i> chromosomes | $\pi$ -sat <sup>el</sup>                  | n/a                   | 42                                 |

**Table S1: Summary of centromere repeats in *M. musculus*, *M. spretus*, *M. caroli*, and *M. pahari*.**

Various *Mus* species have major sequence differences at the centromere in terms of both sequence identity and repeat size. For other *M. pahari* chromosomes,  $\pi$ -sat<sup>tel</sup> has a complex repeat (Fig. 4B), so it is listed as n/a.
